# Supplementary material for: Depot-Dependent Impact of Time-Restricted Feeding on Adipose Tissue Metabolism in High Fat Diet-Induced Obese Male Mice
Source: MDPI journal article supplement (doi:10.3390/nu15010238), 2023-01-03
Supplement: s1 [file s1]

**Supplemental Table S1**

| <b>Gene name</b> | <b>Forward primer</b>    | <b>Reverse primer</b>      |
|------------------|--------------------------|----------------------------|
| Ucp1             | TAATGACTGGAGGTGTGGCAGTGT | TGTTGACAAGCTTTCTGTGGTGGC   |
| Tfam             | CACTGGGAAACCACAGCATACAG  | GGACATCTGAGGAAAAGCCTTGC    |
| Err $\alpha$     | CCAGACAGCAGCCTCAAAAAC    | GATAGGGACCGAACACAGATCCT    |
| Pgc-1 $\alpha$   | ACCGTAAATCTGCGGGATGATGGA | AGTCAGTTTCGTTTCGACCTGCGTA  |
| Scd1             | CACTGAATGCGAGGGTTGGTTGTT | TCCTTTCAGCAGCACTGTACCACT   |
| Elov15           | GGTGGCTGTTCTTCCAGATT     | CCCTTCAGGTGGTCTTTCC        |
| Cpt1             | CCTCCCTGGGCATGATTG       | ACGCCACTCACGATGTTCTTC      |
| Atp5b            | GCAAGGCAGGGACAGCAGA      | CCCAAGGTCTCAGGACCAACA      |
| Cidea            | TGCTCTTCTGTATCGCCCAGT    | GCCGTGTTAAGGAATCTGCTG      |
| COXIV            | ATGTCACGATGCTGTCTGCC     | GTGCCCCTGTTTCATCTCGGC      |
| Atgl             | TGTGGCCTCATTCTCCTAC      | TCGTGGATGTTGGTGGAGCT       |
| Hsl              | AGGTGGGAATCTCTGCATCACTGT | TGTCCCTGAATAGGCACTGACACA   |
| Pparg            | CAAGAATACCAAAGTGCGATCAA  | GAGCAGGGTCTTTTCAGAATAATAAG |
| Lpl              | TGAGAAAGGGCTCTGCCTGA     | GGGCATCTGAGAGCGAGTCTT      |
| Srebp-1c         | CTTTCCTGGCTTGTCTTTGGGA   | GCTGGAAGGCAAAGGAACAACTGA   |
| Glut4            | GTAACCTTCATTGTCGGCATGG   | AGCTGAGATCTGGTCAAACG       |
| Dgat             | CTCTGCCACAGCATTGAGAC     | TGCTACGACGAGTTCTTGAG       |
| Fasn             | CTGGACTCGCTCATGGGTG      | CATTTCTGAAGTTTCCGCAG       |
| Tbp              | ACCCTTCACCAATGACTCCTATG  | TGACTGGAGCAAATCGCTTGG      |
